# Supplementary material
Source: Research Square preprint supplement (doi:10.21203/rs.3.rs-9250677/v1)
Supplement: Supplementary file 1 [file 3d4624b61950a693cd9f325a.docx]

**Table 1** Comparison of general data between the two groups of students

| Variable | Control group (n=252) | Study group (n=249) | *χ²/t* | *P* |
| --- | --- | --- | --- | --- |
| Gender (Male/Female) | 40/212 | 42/207 | 0.090 | 0.857 |
| Age (years) | 19.03±0.81 | 19.12±0.79 | 1.26 | 0.208 |
| Preparatory course scores (points) |  |  |  |  |
| Physiology | 75.78±4.62 | 76.21±4.93 | 1.008 | 0.314 |
| Biochemistry | 78.21±4.62 | 77.93±4.93 | 0.656 | 0.512 |
