# Supplementary material
Source: Research Square preprint supplement (doi:10.21203/rs.3.rs-9250677/v1)
Supplement: Supplementary file 3 [file 5ec5e7fb04173de4af95c356.docx]

**Table 5** Evaluation of the teaching effect of experiment integrated with artistic drawing (n=249)

| Item | Agree with the viewpoint in the item | Agree with the viewpoint in the item |
| --- | --- | --- |
|  | Case number | % |
| 1. Helpful to improve learning interest | 238 | 95.6 |
| 2. Helpful to improve the ability of comprehensive application of knowledge | 241 | 96.8 |
| 3. Helpful to deepen the understanding of theoretical knowledge and the laws of disease occurrence and development | 243 | 97.6 |
| 4. Helpful to cultivate clinical thinking ability in nursing | 229 | 92.0 |
| 5. Helpful to improve aesthetic ability | 235 | 94.4 |
| 6. Ideological and political elements such as professional literacy, patriotism and scientific spirit are integrated in your drawing works | 213 | 85.5 |
| 7. Train imagination and creativity | 242 | 97.2 |
| 8. More vivid and entertaining than traditional teaching classrooms | 237 | 95.2 |
