# Supplementary material
Source: Research Square preprint supplement (doi:10.21203/rs.3.rs-9250677/v1)
Supplement: Supplementary file 4 [file 84a6e0a5421ab858b643cf4d.docx]

**Table 4** Comparison of self-directed learning ability assessment scores between the two groups before and after teaching

| Item | Study group (n=249) | | Control group (n=252) | | *t1* | *P1* | *t2* | *P2* | *t3* | *P3* | *t4* | *P4* |
| --- | --- | --- | --- | --- | --- | --- | --- | --- | --- | --- | --- | --- |
| Before teaching | After teaching | Before teaching | After teaching |
| Learning motivation | 28.87±5.34 | 31.41±5.97 | 28.70±4.42 | 30.45±5.38 | 0.377 | 0.719 | 6.948 | <0.001 | 5.391 | <0.001 | 1.833 | 0.068 |
| Self-management ability | 38.03±5.76 | 39.67±5.89 | 38.15±5.38 | 39.09±5.42 | 0.234 | 0.811 | 4.361 | <0.001 | 2.640 | 0.008 | 1.112 | 0.271 |
| Learning cooperation ability | 17.10±2.39 | 17.45±2.26 | 17.06±2.23 | 16.96±2.14 | 0.188 | 0.854 | 2.331 | 0.035 | 0.694 | 0.542 | 2.414 | 0.017 |
| Information literacy | 21.26±3.32 | 22.13±3.37 | 21.17±3.07 | 21.46±3.09 | 0.305 | 0.742 | 4.029 | 0.001 | 1.428 | 0.230 | 2.248 | 0.025 |
| Total score | 105.25±14.80 | 110.65±15.32 | 105.07±13.15 | 107.96±13.56 | 0.140 | 0.892 | 5.554 | <0.001 | 3.281 | 0.006 | 2.018 | 0.045 |

Note: *t1* and *P1* represent the comparison between the two groups before teaching; *t2* and *P2* represent the comparison of the study group before and after teaching; *t3* and *P3* represent the comparison of the control group before and after teaching; *t4* and *P4* represent the comparison between the two groups after teaching.
