# Supplementary material
Source: Research Square preprint supplement (doi:10.21203/rs.3.rs-9250677/v1)
Supplement: Supplementary file 5 [file 977ddf425b0b3253b4fbe1f0.docx]

**Table 2** Comparison of assessment scores between the two groups of students

| Assessment item | Control group (n=252) | Study group (n=249) | *t* | *P* |
| --- | --- | --- | --- | --- |
| Final theoretical exam score | 72.89±7.34 | 74.13±6.89 | 1.950 | 0.052 |
| Experimental assessment score | 73.47±10.76 | 76.73±9.38 | 3.616 | <0.001 |
