# Supplementary material
Source: Research Square preprint supplement (doi:10.21203/rs.3.rs-9250677/v1)
Supplement: Supplementary file 6 [file fc9824327e021fa9efaf7442.docx]

**Table 3** Comparison of scores on the College Students' Innovation Ability Scale between the two groups before and after teaching

| Item | Study group (n=249) | | Control group (n=252) | | *t1* | *P1* | *t2* | *P2* | *t3* | *P3* | *t4* | *P4* |
| --- | --- | --- | --- | --- | --- | --- | --- | --- | --- | --- | --- | --- |
| Before teaching | After teaching | Before teaching | After teaching |
| Imagination | 13.24±2.31 | 15.72±2.83 | 13.27±2.20 | 14.54±2.71 | 0.144 | 0.886 | 14.873 | <0.001 | 7.803 | <0.001 | 4.618 | <0.001 |
| Critical thinking ability | 13.38±2.42 | 14.21±3.28 | 13.13±2.30 | 14.01±2.83 | 1.148 | 0.252 | 4.461 | <0.001 | 5.176 | <0.001 | 0.709 | 0.480 |
| Knowledge application ability | 8.16±1.61 | 8.50±2.03 | 8.04±1.53 | 8.16±1.61 | 0.829 | 0.408 | 2.875 | 0.003 | 1.159 | 0.403 | 2.016 | 0.045 |
| Problem-solving ability | 11.45±2.13 | 12.84±2.52 | 11.33±1.92 | 11.71±2.23 | 0.642 | 0.522 | 9.229 | <0.001 | 2.780 | 0.005 | 5.153 | <0.001 |
| Total score | 46.21±7.62 | 51.29±9.79 | 45.77±7.08 | 48.67±8.94 | 0.649 | 0.517 | 8.971 | <0.001 | 5.454 | <0.001 | 3.032 | 0.003 |

Note: *t1* and *P1* represent the comparison between the two groups before teaching; *t2* and *P2* represent the comparison of the study group before and after teaching; *t3* and *P3* represent the comparison of the control group before and after teaching; *t4* and *P4* represent the comparison between the two groups after teaching.
